# Supplementary figures and images for: Metal cluster plasmons analyzed by energy-resolved photoemission
Source: Royal Society of Chemistry journal article supplement (doi:10.1039/d2cp03830g), 2022-12-21

Electron yield / arb. units

$\text{Ag}_{91}^-$

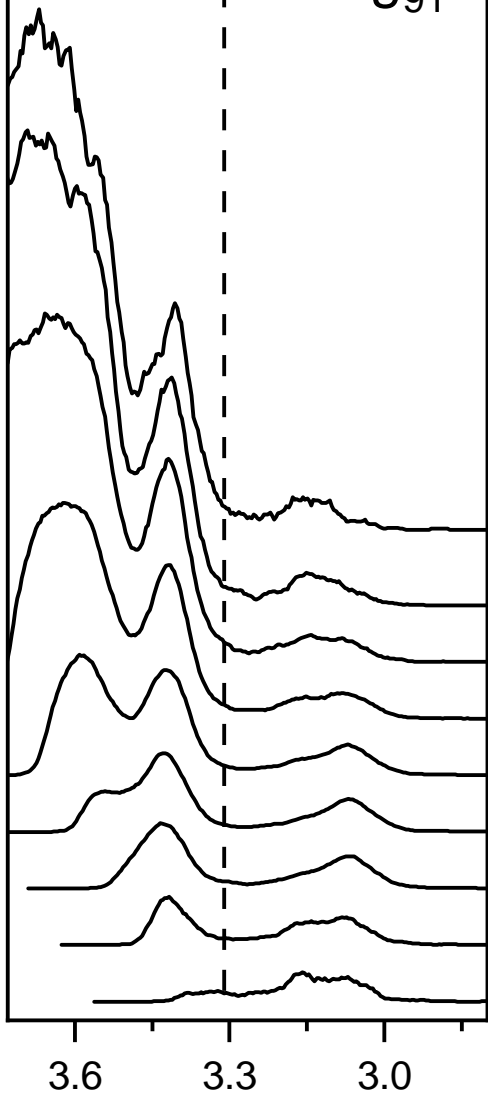

$E_{\text{ph}}=4.11$

4.05

3.97

3.90

3.83

3.76

3.69

3.63

3.56

Binding energy / eV

Supplement: d2cp03830g2.pdf [file d2cp03830g2.pdf]
